# Supplementary material for: Overcharging, thermal, viscoelastic and hydration properties of DNA–gelatin complex coacervates: pharmaceutical and food industries
Source: Royal Society of Chemistry journal article supplement (doi:10.1039/c3ra46618c), 2014-01-01
Supplement: c3ra46618c.pdf [file c3ra46618c.pdf]

## Supplementary Information

### **Overcharging, Thermal, Viscoelastic and Hydration properties of DNA-Gelatin complex coacervates: Pharmaceutical and Food industries**

Najmul Arfin<sup>1</sup>, V. K. Aswal<sup>2</sup> and H. B. Bohidar<sup>1,3\*</sup>

<sup>1,3</sup>Polymer and Biophysics Laboratory, School of Physical Sciences, Jawaharlal Nehru University, New Delhi 110067, India

<sup>2</sup>Solid State Physics Division, Bhabha Atomic Research Centre, Mumbai 400085, India

<sup>3</sup>Special Centre for Nanosciences, School of Physical Sciences, Jawaharlal Nehru University, New Delhi 110067, India

\*Corresponding author email : [bohi0700@mail.jnu.ac.in](mailto:bohi0700@mail.jnu.ac.in)

Tel: +91 11 2670 4699, Fax: +91 11 2674 1837

Coacervates were made in aqueous solution and so pH of the solution varies according to mixing ratio of two polymers. The following table is given for visualising pH change in system.

pH of DNA (0.005% (w/v)) solution = 6.6

**Table S1**

| <b>Conc. (% (w/v)) of pure GA in aqueous solution</b>        | <b>pH</b> |
|--------------------------------------------------------------|-----------|
| 0.0011                                                       | 5.87      |
| 0.0093                                                       | 5.62      |
| 0.0375                                                       | 5.32      |
| 0.075                                                        | 5.29      |
| 0.15                                                         | 5.23      |
| 0.25                                                         | 5.20      |
| <b>GA (% (w/v)) + DNA (0.005% (w/v)) in aqueous solution</b> | <b>pH</b> |
| 0.0011                                                       | 6.51      |
| 0.0093                                                       | 6.46      |
| 0.0375                                                       | 6.30      |
| 0.075                                                        | 5.8       |
| 0.15                                                         | 5.41      |
| 0.25                                                         | 5.30      |
